# Supplementary material for: Effects of Hydroxylated Polybrominated Diphenyl Ethers in Developing Zebrafish Are Indicative of Disruption of Oxidative Phosphorylation
Source: MDPI journal article supplement (doi:10.3390/ijms18050970), 2017-05-03
Supplement: s1 [file s1]

# Supplementary Materials: Effects of Hydroxylated Polybrominated Diphenyl Ethers in Developing Zebrafish Are Indicative of Disruption of Oxidative Phosphorylation

Jessica Legradi, Marinda van Pomerén, Anna-Karin Dahlberg and Juliette Legler

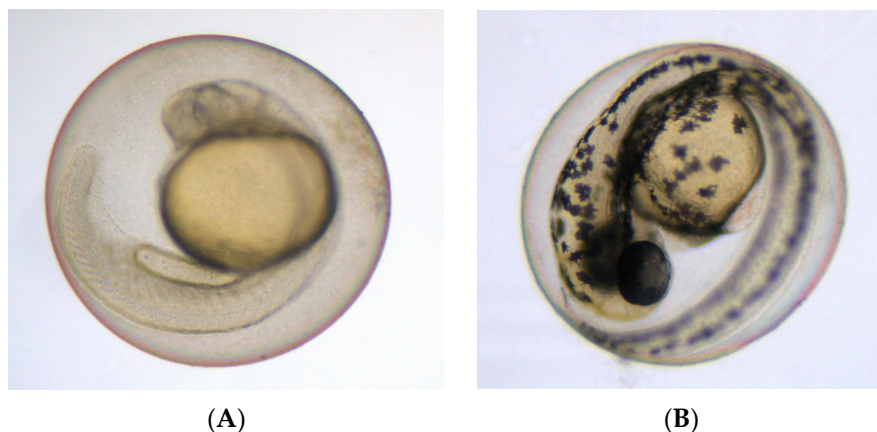

**Figure S1.** (A) Control image of 24 hpf; (B) Control image of 48 hpf. Magnification was 2 $\times$ .

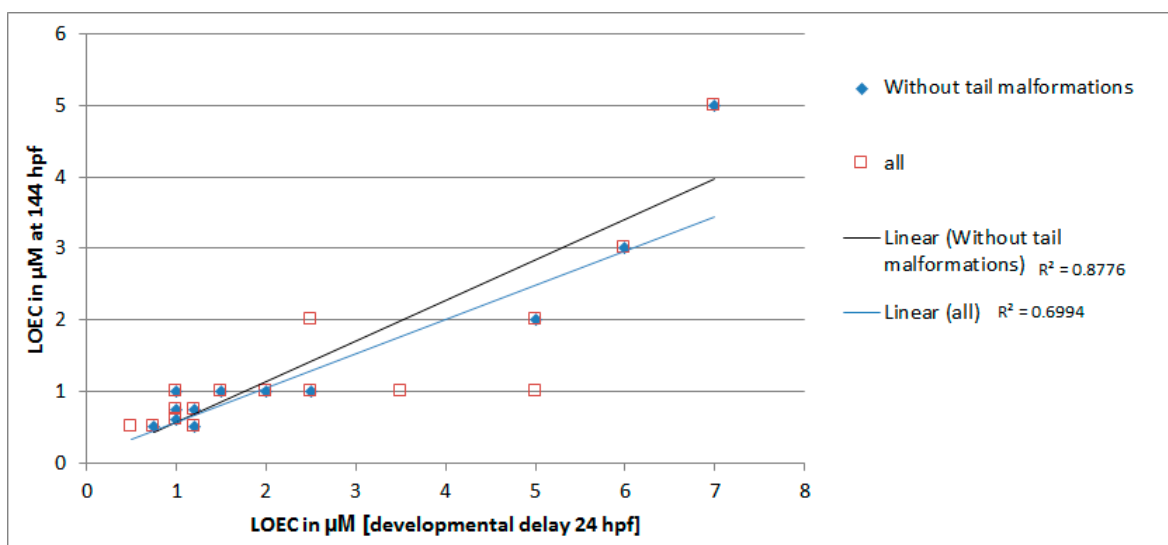

**Figure S2.** Correlation of LOECs derived from 144 hpf vs. LOECs derived from 24 hpf. With and without tail malformations (effects on heart beat, edema).

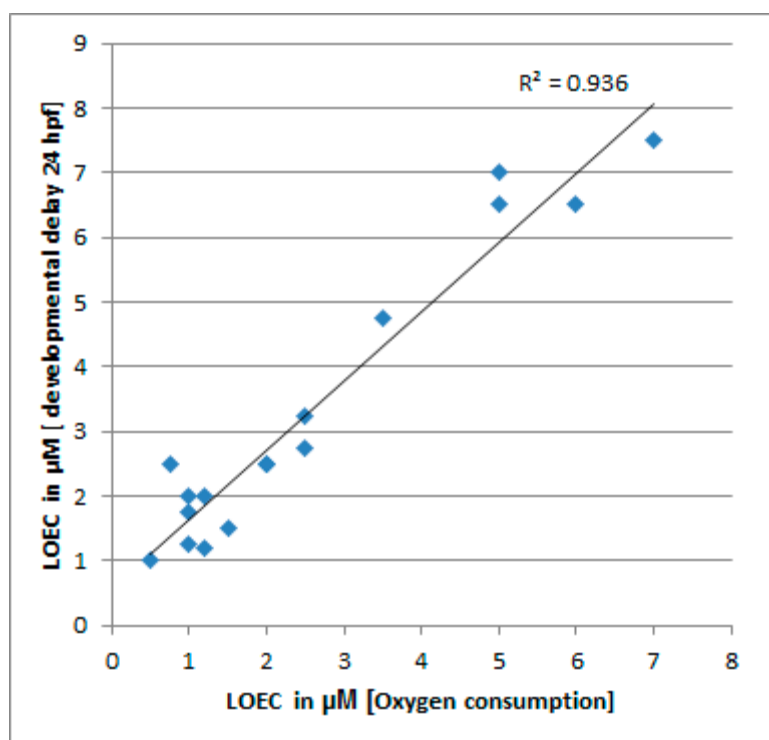

**Figure S3.** Correlation of LOECs derived from altered oxygen consumption versus LOECs derived from 24 hpf developmental delay.

**Table S1.** Effects observed at 6 days of development to LOEC and higher. Tail malformations are highlighted in bold.

| Compound          | Effects Observed at 144 hpf                                                                |
|-------------------|--------------------------------------------------------------------------------------------|
| 2'-OH-6'-CL-BDE68 | Delay/Stop in development (less pigmentation) —lower heartbeat                             |
| 2-OH-BDE123       | Delay/Stop in development                                                                  |
| 2'-OH-BDE28       | Delay/Stop in development (less pigmentation)                                              |
| 2'-OH-BDE66       | Delay in development (no pigmentation) —cardiac edema                                      |
| 2'-OH-BDE68       | Delay/Stop in development (less pigmentation)                                              |
| 3-OH-BDE153       | Delay/Stop in development (less pigmentation), <b>curved tail</b>                          |
| 3'-OH-BDE154      | Delay/Stop in development (less pigmentation)                                              |
| 3-OH-BDE155       | Delay/Stop in development (less pigmentation), <b>curved tail</b>                          |
| 3-OH-BDE47        | Delay in development (less pigmentation), less heartbeat and movement                      |
| 5-OH-BDE47        | Delay/Stop in development, <b>curved tail</b> , delay in hatching, less movement           |
| 6-OH-5-CL-BDE47   | Delay/Stop in development (less pigmentation)                                              |
| 6-OH-BDE137       | Delay/Stop in development (less pigmentation) less movement and a decreased heartbeat rate |
| 6-OH-BDE47        | Delay in development (less pigmentation), <b>curved tail</b> , less heartbeat              |
| 6'-OH-BDE49       | shorter, cardiac edema, less movement                                                      |
| 6-OH-BDE85        | Delay/Stop in development (less pigmentation)                                              |
| 6-OH-BDE90        | <b>Tail malformations</b> , less movement                                                  |
| 6-OH-BDE99        | Delay in development (no pigmentation)—cardiac edema                                       |

**Table S2.** Blue mussel mix. Concentration of seven OH-PBDEs reported in Blue mussel in the concentrated and the diluted mixture (100× to 100×). Concentrations are in μM. NOEC and LOEC values for developmental toxicity in the first 24 h exposure are also shown.

|              | NOEC | LOEC | 100× Mix | 10× Mix     | Blue Mussel Conc. | 10× Mix | 100× Mix |
|--------------|------|------|----------|-------------|-------------------|---------|----------|
| 6-OH-BDE47   | 0.1  | 0.5  | 1.71     | 0.171       | 0.0171            | 0.00171 | 0.000171 |
| 2'-OH-BDE68  | 0.5  | 1    | 0.8      | 0.08        | 0.008             | 0.0008  | 0.00008  |
| 6-OH-BDE85   | 0.5  | 1    | 1.97     | 0.197       | 0.0197            | 0.00197 | 0.000197 |
| 6-OH-BDE90   | 0.25 | 2    | 0.84     | 0.084       | 0.0084            | 0.00084 | 0.000084 |
| 6-OH-BDE99   | 0.5  | 1    | 2.24     | 0.224       | 0.0224            | 0.00224 | 0.000224 |
| 2'-OH-BDE123 | 1.25 | 2    | 0.12     | 0.012       | 0.0012            | 0.00012 | 0.000012 |
| 6-OH-BDE137  | 0.1  | 1.2  | 1.08     | 0.108       | 0.0108            | 0.00108 | 0.000108 |
|              |      |      |          | below NOEC  |                   |         |          |
|              |      |      |          | above NOEC, |                   |         |          |
|              |      |      |          | below LOEC  |                   |         |          |
|              |      |      |          | above LOEC  |                   |         |          |

**Table S3.** Nominal and measured concentrations of 6-OH-BDE47 measured in exposure medium before and after 0–24 and 24–48 h in nM.

| Nominal Conc.<br>(nM) | Exposure Time<br>(h) | Replicate 1<br>(nM) | Replicate 2<br>(nM) | Replicate 3<br>(nM) | Mean (nM) |
|-----------------------|----------------------|---------------------|---------------------|---------------------|-----------|
| 75                    | 0                    | 8.8                 | 8.9                 | 8.2                 | 8.6       |
| 75                    | 24                   | 1.1                 | 1.8                 | 1.7                 | 1.5       |
| 75                    | 48                   | n.a                 | 0.9                 | 1.0                 | 1.0       |
| 100                   | 0                    | 12                  | 13                  | 11                  | 12        |
| 100                   | 24                   | 2.9                 | 2.9                 | 2.8                 | 2.8       |
| 100                   | 48                   | 2.3                 | 1.9                 | 2.2                 | 2.1       |
| 140                   | 0                    | 15                  | 15                  | 14                  | 15        |
| 140                   | 24                   | 2.9                 | 3.3                 | 3.6                 | 3.3       |
| 140                   | 48                   | 3.0                 | n.a                 | 2.1                 | 2.5       |

n.a = not analysed.
